# Supplementary material
Source: PubMed Central journal article supplement (PMC3262688)
Supplement: supp_45.5.938_Ito_ODS.pdf [file supp_45.5.938_Ito_ODS.pdf]

## Supplementary data

### Hypoxia Inducible Factor Regulates Surfactant Protein Expression in Alveolar Type II Cells *in vitro*

Yoko Ito<sup>1§</sup>, Aftab Ahmad<sup>2</sup>, Emily Kewley<sup>3</sup>, Robert J. Mason<sup>1</sup>

#### Materials and Methods

##### *Rat ATII cell isolation and culture*

Freshly isolated or frozen ATII cells (2.5 million) were plated on 4.2 cm<sup>2</sup> millicell inserts (Millipore Corp, Bellerica, MA) that had been previously coated with a mixture of 20% Matrigel (BD Biosciences, Bedford, MA) and 80% rat-tail collagen in Dulbecco's Modified Eagle's Medium (DMEM) containing 5% rat serum (RS) (Pel-Freez Biologicals, Rogers, AR), 2 mM glutamine, 2.5 µg/ml amphotericin B, 100 µg/ml streptomycin, 100 units/ml penicillin G (all from Mediatech, Inc.), and 10 µg/ml gentamicin (Sigma-Aldrich, St. Louis, MO).

##### *Immunoblotting and real-time PCR (RT-PCR)*

Polyacrylamide gradient gels (8–16%; Invitrogen Corporation) run in tris glycine buffer were used to separate proteins. Proteins were run in the reduced state except for mature SP-B, which was run unreduced. For western blotting, protein loading was normalized to glyceraldehyde-3-phosphate dehydrogenase (GAPDH) or beta-actin (β-actin). The primary antibodies were rabbit anti-rat SP-A and SP-D (in-house product), rabbit anti-sheep mature SP-B (Chemicon International, Temecula, CA), rabbit anti-human proSP-C, rabbit anti-human mature SP-C (Seven Hills Bioreagents, Cincinnati, OH), rabbit anti-human Pyruvate dehydrogenase kinase (PDK) 1 (Stressgen, Ann Arbor, MI), mouse anti-human HIF1α (BD Biosciences), rabbit anti-mouse/human HIF2α (Novus Biologicals, Littleton CO), mouse anti-rabbit GAPDH (abcam, Cambridge, MA), and mouse anti-β-actin (Sigma-Aldrich). The intensities of the bands were calculated using NIH Image software (version 1.62). For real-time RT-PCR, the expression levels of genes were expressed as a ratio to the expression of the constitutive probe Cyclophilin B (CyB). The specific primers and probes of surfactant proteins and CyB were listed in supplemental Table 1, and those of vascular endothelial growth factor (VEGF) and glucose Glucose transporter 1 (GLUT1) were purchased from Applied Biosystems (Foster City, CA).

##### *Morphology*

The cells were fixed in 4% paraformaldehyde, and then the filters were embedded in paraffin as described (26). The primary antibodies included rabbit anti-rat SP-A (in-house product) and rabbit anti-human proSP-C (Seven Hills Bioreagents). The secondary antibody was Alexa Fluor 488 donkey anti-rabbit IgG (H+L) from Invitrogen Corporation (Eugene, OR).

**Supplemental Figure 1. Immunocytochemistry of SP-A and proSP-C and electron microscopy (EM) images from rat ATII cells cultured for 7 days**

(A) Rat ATII cells were adhered for 1 day and cultured for 6 days in 5% RS and 10 ng/ml KGF. Rat ATII cells were fixed on day 7 were stained by SP-A. Upper panel shows the immunocytochemistry picture from the cells cultured in the A/L interface condition. Lower panel shows the picture from cells cultured in the submerged condition. (B) Rat ATII cells fixed on day 7 were stained by proSP-C. Upper panel shows the immunocytochemistry picture from cells cultured in the A/L interface condition. Lower panel shows the picture from cells cultured in the submerged condition. green: surfactant proteins, blue: DAPI (C) Rat ATII cells were fixed on day 7. Left panel shows an EM image of the cells cultured in the A/L interface condition. Right panel shows an EM image of the cells cultured in the submerged condition.

**Supplemental Figure 2. Decreased mRNA levels of surfactant proteins and increased mRNA levels of GLUT1 in rat ATII cells by DMOG**

Rat ATII cells were adhered for 1 day and cultured for 6 days in 5% RS, 10 ng/ml KGF, 0.58% ethanol and PBS for 6 days either in A/L interface, in submerged, or in A/L interface conditions with 1mM DMOG dissolved in 0.58% ethanol and PBS. The mRNA levels of surfactant proteins, VEGF and GLUT1 were measured by real-time PCR from 4 independent experiments. These levels were normalized to the constitutive probe cyclophilin B. Values are means  $\pm$  SEM for 4 independent experiments. \*:  $p < 0.05$ .

**Supplemental Table 1. Sequence of primer and probes used in this study**

| <b>Gene Name</b> | <b>Forward Primer</b>  | <b>Probe</b>                             | <b>Reverse Primer</b> |
|------------------|------------------------|------------------------------------------|-----------------------|
| <b>SP-A</b>      | CACCAATGGGCAGTCAGTCA   | CTCCTGCTCTGGTACACATCTCTTTAAT<br>GGTATCAA | CCTCGGGACAGCAATGTTG   |
| <b>SP-B</b>      | CCATCCCTCTGCCCTTCTG    | ACCCGCTTGATCAGAGTCCTGCAAAG               | CACCCTTGGGAATCACAGCTT |
| <b>SP-C</b>      | GTCCCAGGAGCCAGTTTCG    | TCCCTGCTGCCCGTGCA                        | CACGATGAGAAGGCGTTGAG  |
| <b>SP-D</b>      | AGAGGAATCAAAGGCGAAAGTG | CTCCAGACAGTGCTGCTCTGAGGCA                | TCCATTCAAAGCCTCCATCTG |
| <b>CyB</b>       | TCGGAGCGCAATATGAAGGT   | TCTCGCCGCCGCCCTCAT                       | CAGGCAGCAAAGGAAGACAA  |

Definition of abbreviation; SP: surfactant protein, CyB: Cyclophilin B
