# Supplementary material
Source: PubMed Central journal article supplement (PMC3262688)

(A)

SP-A

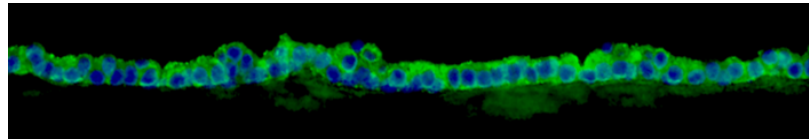

A/L interface  
condition

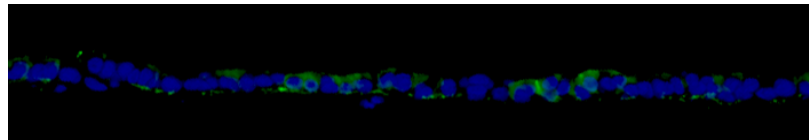

submerged  
condition

(B)

proSP-C

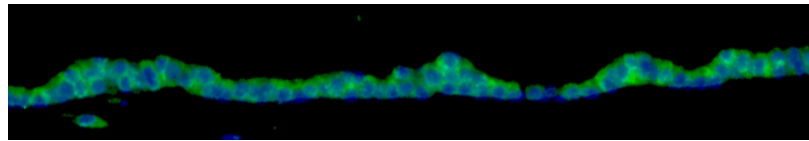

A/L interface  
condition

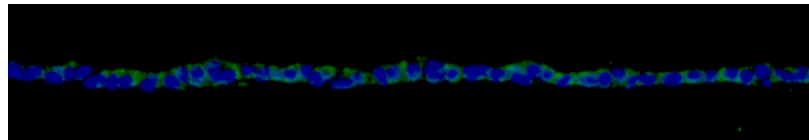

submerged  
condition

(C)

A/L interface condition

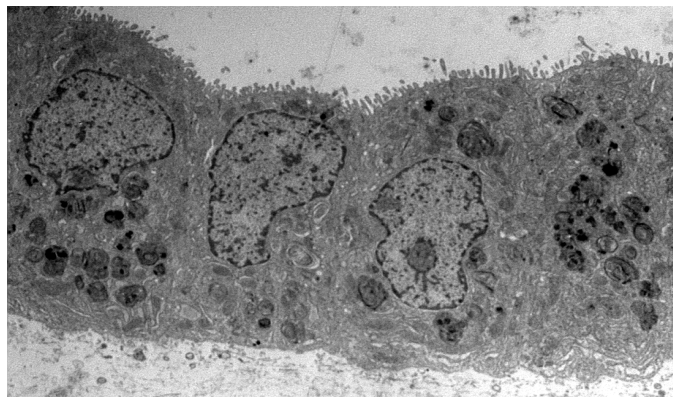

submerged condition

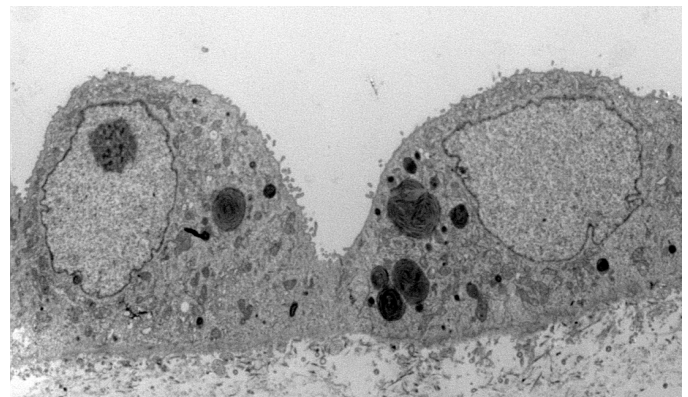

■ A/L interface condition  
□ submerged condition  
■ A/L interface condition with DMOG

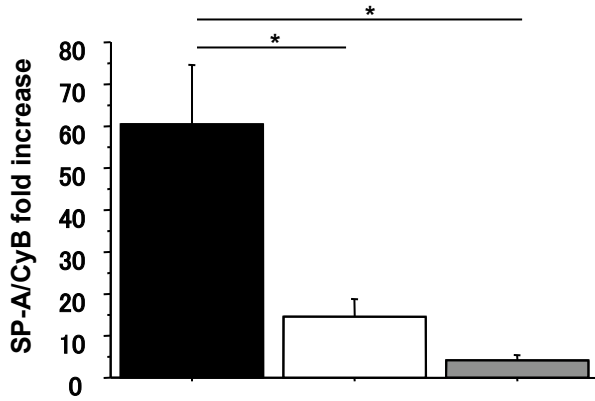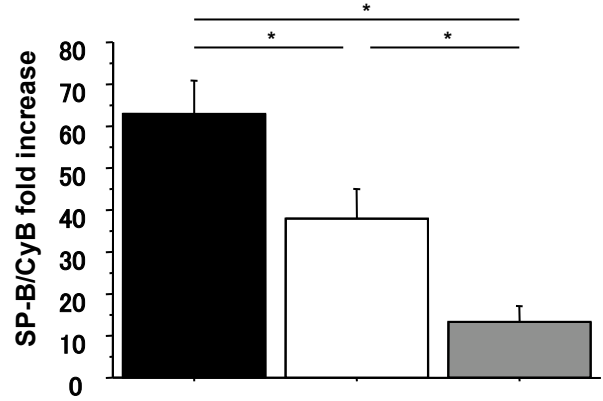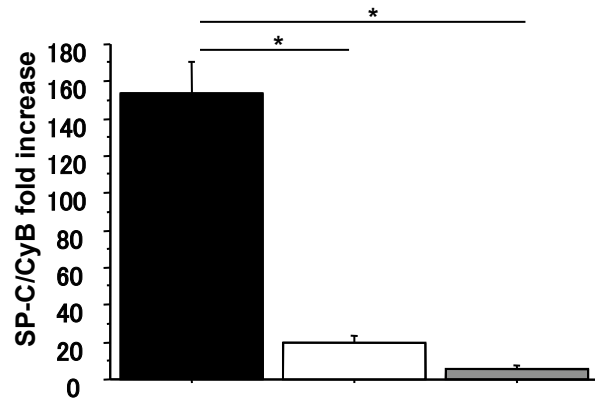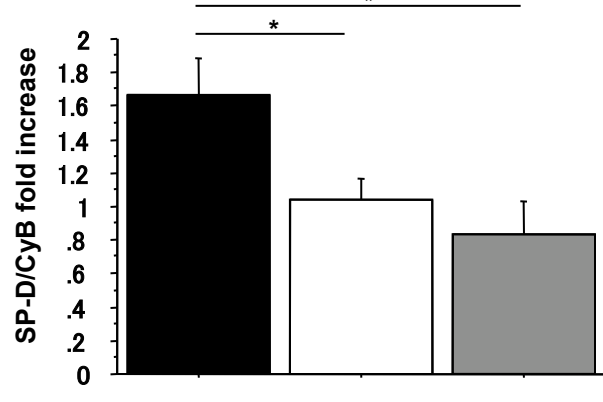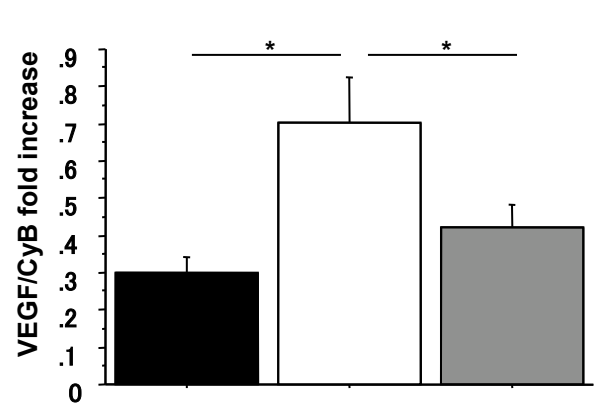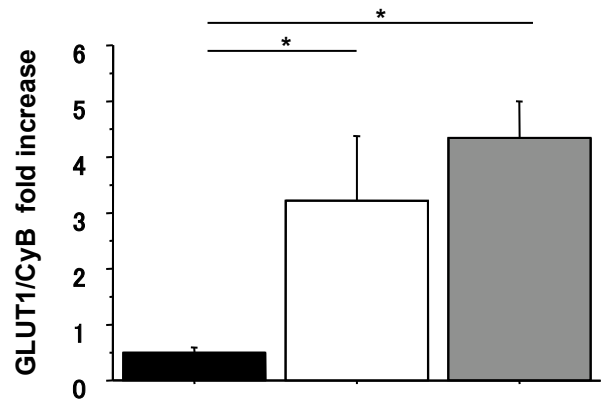

Supplement: supp_45.5.938_Ito_ODS_supp_fig_1_-_2.pdf [file supp_45.5.938_Ito_ODS_supp_fig_1_-_2.pdf]
